# Supplementary material for: Predicting 90-day modified Rankin Scale score with discharge information in acute ischaemic stroke patients following treatment
Source: PubMed Central journal article supplement — BMJ Neurol Open. 2021 Jun 24;3(1):e000177. doi: 10.1136/bmjno-2021-000177 (PMC8231000; doi:10.1136/bmjno-2021-000177), 2021-06-24
Supplement: bmjno-2021-000177supp001.pdf [file bmjno-2021-000177supp001.pdf]

## Supplementary Material

The results in **Table 2** were robust to using Fischer's exact test and when estimating p-values via Monte Carlo simulation. Also, when we performed the analysis in **Table 3** with just the observations with complete information, we found neither transfer status nor last known well time to arrival to be significantly associated with 90-day mRS.

**Supplementary Table 1: Demographic and clinical characteristics of stroke survivors who received treatment stratified by follow-up status.**

| Variable                        | Overall<br>n = 701 | Follow-up<br>n = 280 (39.9%) | Incomplete Follow-up<br>n = 421 (60.1%) | p-value |
|---------------------------------|--------------------|------------------------------|-----------------------------------------|---------|
| Age                             |                    |                              |                                         | 0.282   |
| <65                             | 261 (37.4%)        | 97 (34.6%)                   | 164 (39.0%)                             |         |
| ≥65                             | 440 (62.8%)        | 183 (65.4%)                  | 257 (61.0%)                             |         |
| Sex                             |                    |                              |                                         | 1.000   |
| Female                          | 331 (47.2%)        | 132 (47.1%)                  | 199 (47.2%)                             |         |
| Male                            | 370 (52.8%)        | 148 (52.9%)                  | 222 (52.8%)                             |         |
| Race                            |                    |                              |                                         | 0.115   |
| Black                           | 122 (17.4%)        | 51 (18.2%)                   | 71 (16.9%)                              |         |
| Other                           | 177 (25.2%)        | 59 (21.1%)                   | 118 (28.0%)                             |         |
| White                           | 402 (57.3%)        | 170 (60.7%)                  | 232 (55.1%)                             |         |
| NIHSS on Admission              |                    |                              |                                         | 0.173   |
| 0-9                             | 333 (47.5%)        | 120 (42.9%)                  | 213 (50.6%)                             |         |
| 10-19                           | 242 (34.5%)        | 103 (36.8%)                  | 139 (33.0%)                             |         |
| 20-42                           | 122 (17.4%)        | 56 (20.0%)                   | 66 (15.7%)                              |         |
| Missing                         | 4 (0.6%)           | 1 (0.4%)                     | 3 (0.7%)                                |         |
| Stroke Risk Factors             |                    |                              |                                         |         |
| Atrial Fibrillation             | 119 (17.0%)        | 59 (21.1%)                   | 60 (14.3%)                              | 0.024   |
| Coronary Artery Disease         | 111 (15.8%)        | 46 (16.4%)                   | 65 (15.4%)                              | 0.806   |
| Diabetes Mellitus               | 145 (20.7%)        | 54 (19.3%)                   | 91 (21.6%)                              | 0.515   |
| Dyslipidemia                    | 254 (36.2%)        | 105 (37.5%)                  | 149 (35.4%)                             | 0.625   |
| Hypertension                    | 434 (61.9%)        | 171 (61.1%)                  | 263 (62.5%)                             | 0.769   |
| Obesity                         | 306 (43.7%)        | 124 (44.3%)                  | 182 (43.2%)                             | 0.843   |
| Previous Stroke                 | 76 (10.8%)         | 25 (8.9%)                    | 51 (12.1%)                              | 0.228   |
| Smoker                          | 88 (12.6%)         | 41 (14.6%)                   | 47 (11.2%)                              | 0.213   |
| Last Known Well Time to Arrival |                    |                              |                                         | 0.916   |

| Variable              | Overall<br>n = 701 | Follow-up<br>n = 280 (39.9%) | Incomplete Follow-up<br>n = 421 (60.1%) | p-value |
|-----------------------|--------------------|------------------------------|-----------------------------------------|---------|
| 0-6 hours             | 622 (88.7%)        | 248 (88.6%)                  | 374 (88.8%)                             |         |
| 6-24 hours            | 65 (9.3%)          | 27 (9.7%)                    | 38 (9.0%)                               |         |
| Missing               | 14 (2.0%)          | 5 (1.8%)                     | 9 (2.1%)                                |         |
| Transfer              |                    |                              |                                         | <0.001  |
| Transfer              | 421 (60.1%)        | 137 (48.9%)                  | 284 (67.5%)                             |         |
| Not Transfer          | 222 (31.7%)        | 117 (41.8%)                  | 105 (24.9%)                             |         |
| Missing               | 14 (8.3%)          | 26 (9.3%)                    | 32 (7.6%)                               |         |
| IV-tPA                | 616 (87.9%)        | 233 (83.2%)                  | 383 (91.0%)                             | 0.003   |
| EVT                   | 215 (30.7%)        | 111 (39.6%)                  | 104 (24.7%)                             | <0.001  |
| LOS                   |                    |                              |                                         | 0.747   |
| ≤7 Days               | 407 (58.1%)        | 160 (57.1%)                  | 247 (58.7%)                             |         |
| >7 Days               | 294 (41.9%)        | 120 (42.9%)                  | 174 (41.3%)                             |         |
| Discharge Disposition |                    |                              |                                         | 0.683   |
| Home                  | 296 (42.2%)        | 122 (43.6%)                  | 174 (41.3%)                             |         |
| IRF                   | 290 (41.7%)        | 116 (41.4%)                  | 174 (41.3%)                             |         |
| SNF                   | 115 (16.4%)        | 42 (15.0%)                   | 73 (17.3%)                              |         |
| Discharge mRS         |                    |                              |                                         | 0.556   |
| 0                     | 139 (19.8%)        | 64 (22.9%)                   | 75 (17.8%)                              |         |
| 1                     | 140 (20.0%)        | 57 (20.4%)                   | 83 (19.7%)                              |         |
| 2                     | 94 (13.4%)         | 36 (12.9%)                   | 58 (13.8%)                              |         |
| 3                     | 115 (16.4%)        | 47 (16.8%)                   | 68 (16.2%)                              |         |
| 4                     | 171 (24.4%)        | 61 (21.8%)                   | 110 (26.1%)                             |         |
| 5                     | 42 (6.0%)          | 15 (5.4%)                    | 27 (6.4%)                               |         |

Incomplete follow-up group was defined as the stroke survivors who were missing mRS scores at 30-days and/or 90-days follow-up periods. Categorical variables were presented with n (%). Abbreviations: inpatient rehabilitation facility (IRF), skilled nursing facility (SNF), National Institutes of Health Stroke Scale (NIHSS), intravenous tissue-type plasminogen activator (IV-tPA), endovascular therapy (EVT), length of stay (LOS), modified Rankin Scale (mRS). The denominator for the stratified groups in the header is n = 701. Comparison of the follow-up and incomplete follow-up groups was conducted using Pearson's chi-squared test for categorical variables.

**Supplementary Table 2: Positive and negative predictive values and likelihood ratios for all discharge variables to predict unfavorable outcome (mRS 3-6) at the 90-day follow-up period.**

| Variable                 | PPV (95% CI)       | NPV (95% CI)       | PLR (95% CI)      | NLR (95 % CI)    |
|--------------------------|--------------------|--------------------|-------------------|------------------|
| Discharge Disposition:   |                    |                    |                   |                  |
| IRF                      | 60.3% (51.4-69.2%) | 64.0% (56.7-71.4%) | 1.78 (1.33-2.38)  | 0.66 (0.53-0.82) |
| SNF                      | 88.1% (78.3-97.9%) | 61.3% (55.2-67.5%) | 8.66 (3.51-21.39) | 0.74 (0.66-0.83) |
| IRF/SNF                  | 67.7% (60.4-75.0%) | 82.0% (75.1-88.8%) | 2.46 (1.94-3.11)  | 0.26 (0.17-0.38) |
| Discharge mRS: 3-5       | 72.4% (64.5-80.3%) | 74.5% (67.8-81.3%) | 3.06 (2.23-4.21)  | 0.40 (0.31-0.52) |
| Selected Variables Model | 74.4% (67.0-81.8%) | 79.6% (73.1-86.1%) | 3.41 (2.50-4.65)  | 0.30 (0.22-0.42) |

Abbreviations: positive predictive value (PPV), negative predictive value (NPV), positive likelihood ratio (PLR), negative likelihood ratio (NLR), confidence interval (CI), inpatient rehabilitation facility (IRF), skilled nursing facility (SNF), length of stay (LOS).
